# Supplementary material for: Tough biodegradable chitosan–gelatin hydrogels via in situ precipitation for potential cartilage tissue engineering
Source: Royal Society of Chemistry journal article supplement (doi:10.1039/c5ra06835e), 2015-01-01
Supplement: c5ra06835e1.pdf [file c5ra06835e1.pdf]

## Tough biodegradable chitosan–gelatin hydrogels via *in situ* precipitation for potential cartilage tissue engineering

Zhi-Sen Shen<sup>a,b,c\*</sup>, Xiang Cui<sup>a,c</sup>, Rui-Xia Hou<sup>c</sup>, Qun Li<sup>a</sup>, Hong-Xia Deng<sup>b</sup> and Jun

Fu<sup>c,\*</sup>

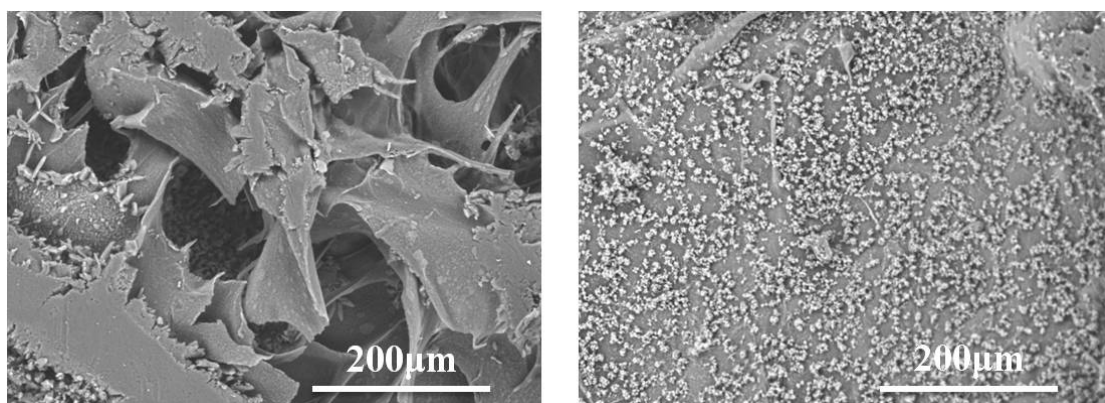

SEM image of C4G8: The pore surface appeared rough and disorder in C4G8, many tiny gelatin particles adhered uniformly on the surface of material.
